# Supplementary material for: Alpha-Synuclein Accumulation and Its Phosphorylation in the Enteric Nervous System of Patients Without Neurodegeneration: An Explorative Study
Source: Front Aging Neurosci. 2020 Nov 23;12:575481. doi: 10.3389/fnagi.2020.575481 (PMC7719782; doi:10.3389/fnagi.2020.575481)
Supplement: Supplementary file 2 [file Data_Sheet_1.XLSX]

## Sheet: Sheet1
Patient ID	Age（Y）	Gender(F/M)	Specimen	Tumor stage	Admission diagnosis	Discharge diagnosis	pathological diagnosis	CEA（ng/ml）	CA125（U/ml）	CA19-9（U/ml）	CA72-4（U/ml）
1	68	F	Ascending colon	T3N0M0,IIA	1.Malignant tumor of ascending colon；2. Primary hypertension；3. Type 2 diabetes mellitus	1.Moderately differentiated adenocarcinoma of ascending colon；2. Primary hypertension；3. Type 2 diabetes	Moderately differentiated adenocarcinoma of ascending colon	1.4	18.7	9.2	0.5
2	66	F	Rectum	T2N0M0,I	1.Rectal tumor; 2. Hypertension	1.Rectal cancer; 2. Hypertension	Moderately differentiated adenocarcinoma of the rectum	2.8	6.4	26.5	1.3
3	39	M	Rectum	T4aN2bM0，IIIC	1. Rectal malignant tumor; 2. Hemorrhoids	1.Rectal cancer; 2. Hemorrhoids	Middle-low differentiated adenocarcinoma of rectum	6.9	18.6	0.7	18.2
4	57	F	Left hemicolon	T3N1bM0,IIIB	1. Sigmoid colon cancer; 2. Internal hemorrhoids	1. Sigmoid colon cancer; 2. Internal hemorrhoids	Middle differentiated adenocarcinoma of the left colon	3.2	9.3	25.6	1.1
5	54	F	Rectum	T3N2bM0,IIIC	1. Rectal tumor; 2. Hyperthyroidism	1. Rectal tumor; 2. Hyperthyroidism	Low differentiation adenocarcinoma of rectum, part of which is signet ring cell carcinoma	12.9	5.4	4.7	76.2
6	57	F	Ileum	T3N0M0,IIA	1.Ileal tumor; 2.Polypectomy of uterus(Postoperative)	1. Neurilemmoma of ileum; 2.Polypectomy of uterus(Postoperative)	Spindle cell tumor of small intestine	N/A	N/A	N/A	N/A
7	81	M	Rectum	T4aN2bM1a,IVA	1. Rectal cancer with multiple liver metastases; 2. Primary hypertension (grade 3, very high risk); 3. Type 2 diabetes; 4. Coronary heart disease (grade I)	1. Rectal cancer with multiple liver metastases; 2. Primary hypertension (grade 3, very high risk); 3. Type 2 diabetes; 4. Coronary heart disease (grade I)	Rectal poorly differentiated adenocarcinoma	9587	26.3	404.9	25.3
8	69	M	Rectum	T4aN1bM0,IIIB	1. Rectal cancer; 2. Primary hypertension (grade 3, very high risk )	1. Rectal cancer; 2. Primary hypertension (grade 3, very high risk )	Moderately differentiated adenocarcinoma of rectum	N/A	N/A	N/A	N/A
9	44	M	Rectum	T4aN2bM0，IIIC	1. Rectal cancer; 2. Lumbar disc herniation	1. Rectal cancer; 2. Lumbar disc herniation	Rectal poorly differentiated adenocarcinoma	2.9	10.2	58.1	47
10	60	F	Ileum	T4aN0M0,IIB	1. Ascending colon cancer; 2. Primary hypertension (grade 3, very high risk); 3. Polypectomy of uterus(Postoperative)	1. Ascending colon cancer; 2. Primary hypertension (grade 3, very high risk); 3. Polypectomy of uterus(Postoperative)	Mucinous adenocarcinoma of colon	4.3	15	13.4	2.2
11	84	M	Right hemicolon	T4aN1aM0,IIIB	1. Malignant tumor of ascending colon	1. Right hemicolon cancer	Differentiated adenocarcinoma of right hemicolon	24.2	20.9	45.8	2.1
12	55	F	Rectum	0	1. Rectal tumor	1. Chronic inflammation of rectum	Chronic inflammation of rectum	1.3	5.4	7.4	0.9
13	55	M	Sigmoid colon	T4aN0M0,IIB	1. Colon tumor; 2. Coronary atherosclerotic heart disease after PCI; 3. Primary hypertension	1. Sigmoid colon cancer; 2. Coronary atherosclerotic heart disease after PCI; 3. Primary hypertension	Moderately differentiated adenocarcinoma of sigmoid colon	N/A	N/A	N/A	N/A
14	79	M	Sigmoid colon	T3N0M0,IIA	1. Malignant tumor of sigmoid colon; 2. Cervical spondylolisthesis(Postoperative)	1. Sigmoid colon cancer; 2. Cervical spondylolisthesis(Postoperative)	Moderately differentiated adenocarcinoma of sigmoid colon	5.6	10.2	37.6	4.2
15	79	M	Rectum	T2N0M0,I	1. Rectal tumor; 2. Primary hypertension (grade 1, high risk); 3. Repair of right inguinal hernia(Postoperative)	1. Rectal tumor; 2. Primary hypertension (grade 1, high risk); 3. Repair of right inguinal hernia(Postoperative)	Moderately differentiated adenocarcinoma of rectum	5.6	13.3	8.3	4
16	74	M	Small intestine	T3N2aM0,IIIB	1. Colon tumor; 2. Left cerebellar infarction (recovery period); 3. Primary hypertension ; 4. Type 2 diabetes	1. Ascending colon cancer; 2. Left cerebellar infarction (recovery period); 3. Primary hypertension ; 4. Type 2 diabetes	Moderately differentiated adenocarcinoma of ascending colon	3.1	21.2	14.7	0.9
17	49	M	Right hemicolon	T4bN1aM1a,IVA	1. Ascending colon cancer	1. Ascending colon cancer	Moderately differentiated adenocarcinoma of ascending colon	4.4	56.1	17.3	2.4
18	70	F	Sigmoid colon	T4aN0M0,IIB	1.Rectal tumor; 2. Cholecystectomy(Postoperative)	1.Rectal cancer; 2. Cholecystectomy(Postoperative)	Moderately differentiated adenocarcinoma of rectum	7.8	8.8	25.4	2.9
19	74	M	Ascending colon	T3N2aM0, IIIB	1. Ascending colon cancer; 2. Primary hypertension (grade 3, very high risk)	1. Ascending colon cancer; 2. Primary hypertension (grade 3, very high risk)	Moderately differentiated adenocarcinoma of ascending colon	N/A	N/A	N/A	N/A
N/A=not available，F=Female，M=Male，CEA=carcinoembryonic antigen，CA125=Carbohydrate antigen 125，CA19-9=carbohydrate antigen 19-9, CA72-4=carbohydrate antigen 72-4
